# Supplementary material for: Biocompatible surface modification of nano-scale zeolitic imidazolate frameworks for enhanced drug delivery
Source: Royal Society of Chemistry journal article supplement (doi:10.1039/c8ra03616k), 2018-01-01
Supplement: c8ra03616k1.pdf [file c8ra03616k1.pdf]

Supporting Information for

## **Biocompatible surface modification of nanoscale zeolitic imidazolate frameworks for enhanced drug delivery**

Yuqing Li, Yongtai Zheng,\* Xinyi Lai, Yuehuan Chu, and Yongming  
Chen\*

School of Materials Science and Engineering, Center for Functional Biomaterials, MOE  
Key Laboratory of Polymeric Composite and Functional Materials (PCFM), Sun Yat-sen  
University, Guangzhou 510275, China.

\*Corresponding author: zhengyt@hotmail.com; chenym35@mail.sysu.edu.cn

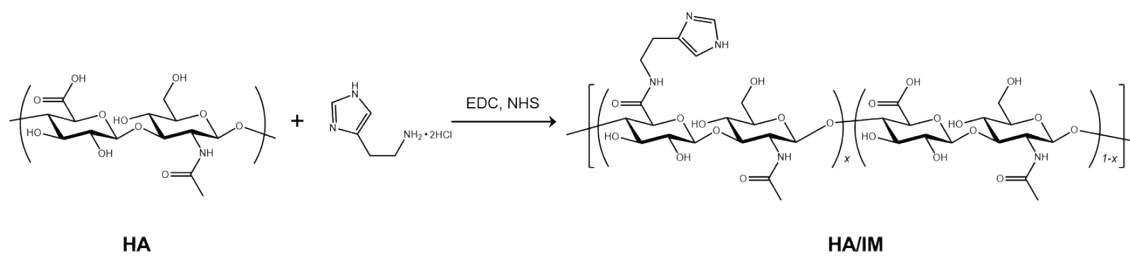

**Scheme S1.** Synthesis route for HA/IM.

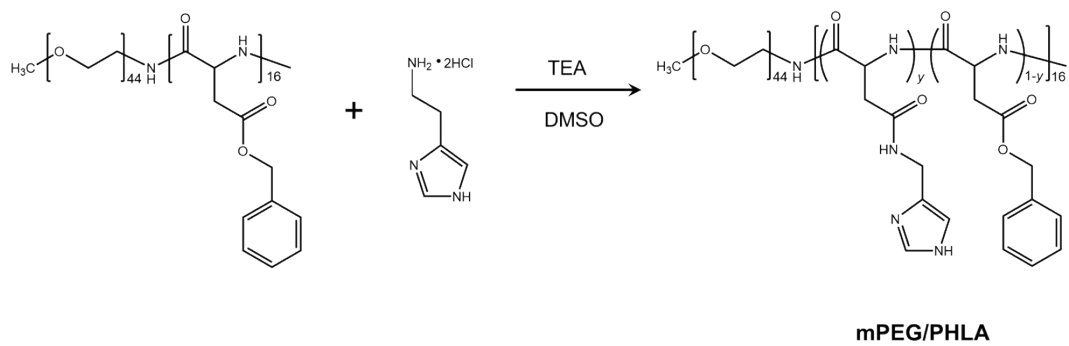

**Scheme S2.** Synthesis route for mPEG-PAsp/IM.

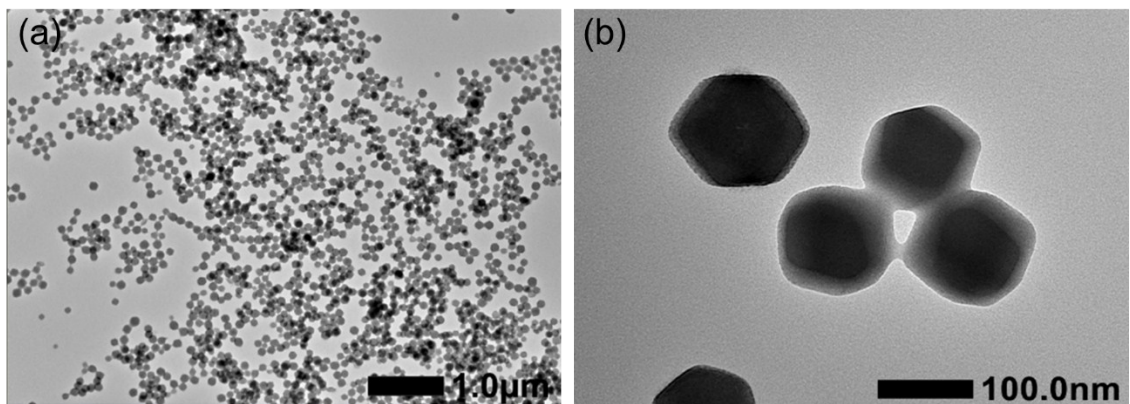

**Fig. S1** TEM images of CCM@ZIF-8 that prepared from methanol solution.

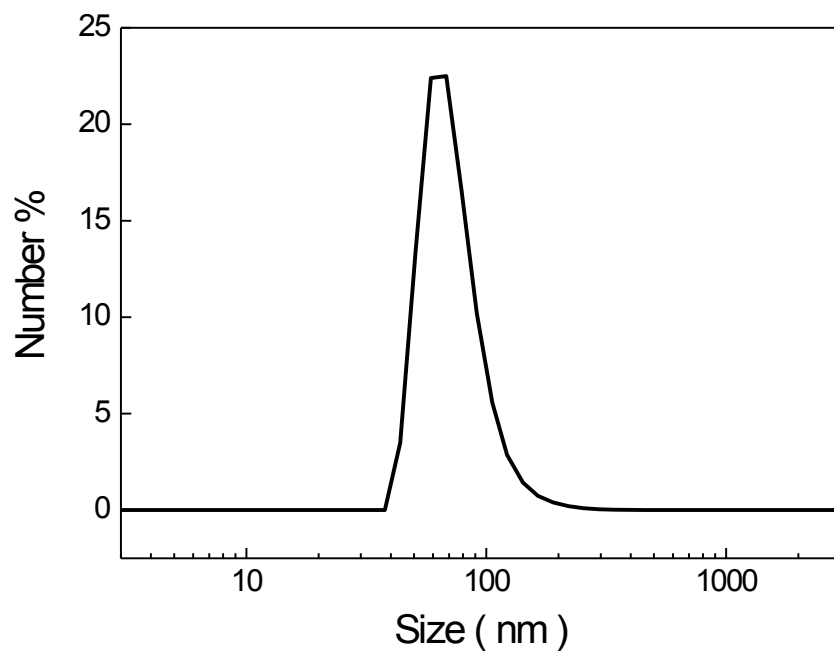

**Fig. S2** Hydrodynamic size distribution of CCM@ZIF-8.

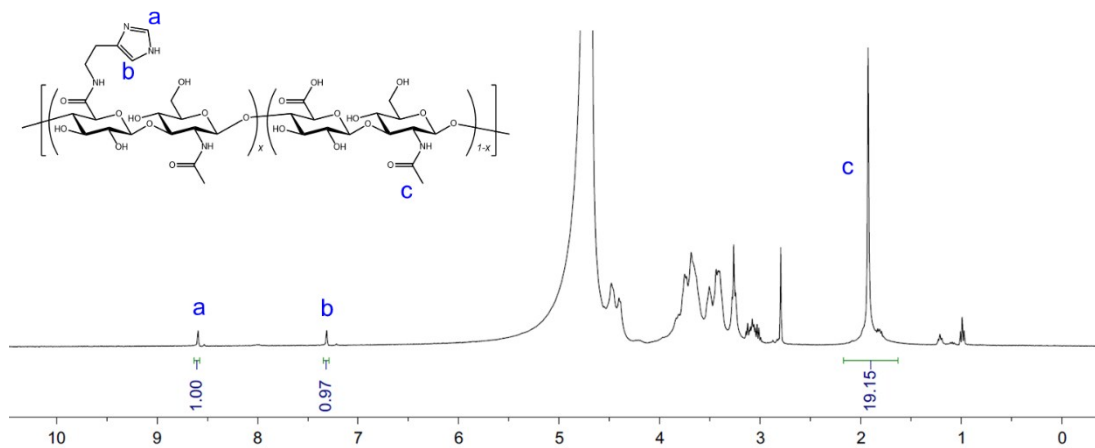

**Fig. S3** <sup>1</sup>H-NMR spectrum of HA/IM in D<sub>2</sub>O. The grafting ratio of IM is determined to be around 16 %.

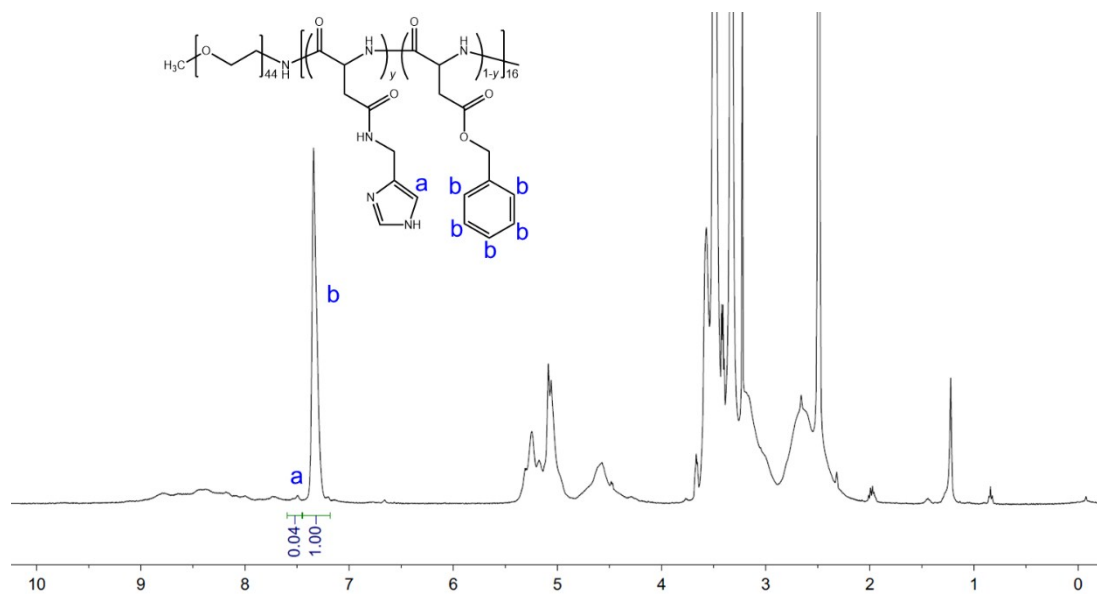

**Fig. S4** <sup>1</sup>H-NMR spectrum of mPEG-PAsp/IM in D<sub>2</sub>O. The grafting ratio of IM is estimated to be around 17 %.

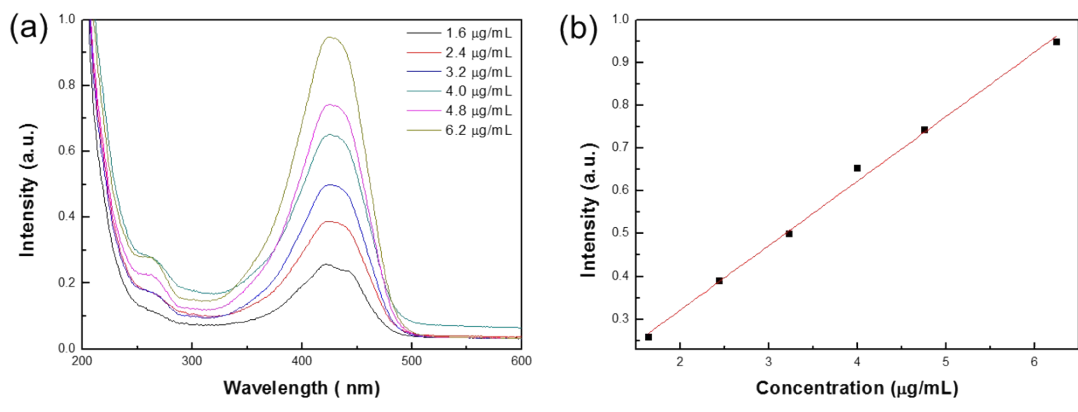

**Fig. S5** UV-vis absorption spectra of CCM at various concentrations (a) and the obtained standard curve for evaluating the amounts of CCM (b).



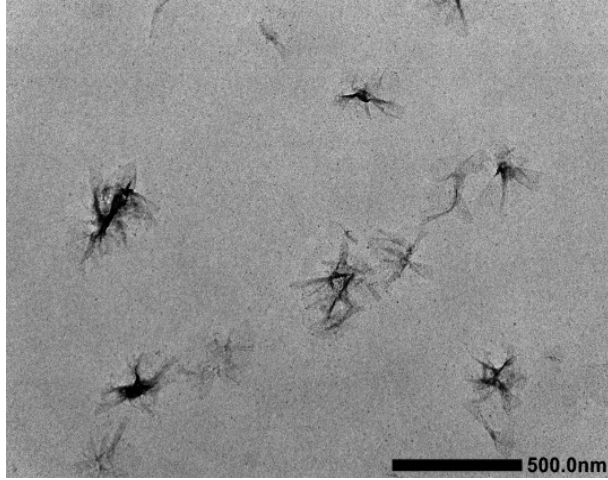

**Fig. S6** TEM image of HA prepared from PBS solution.

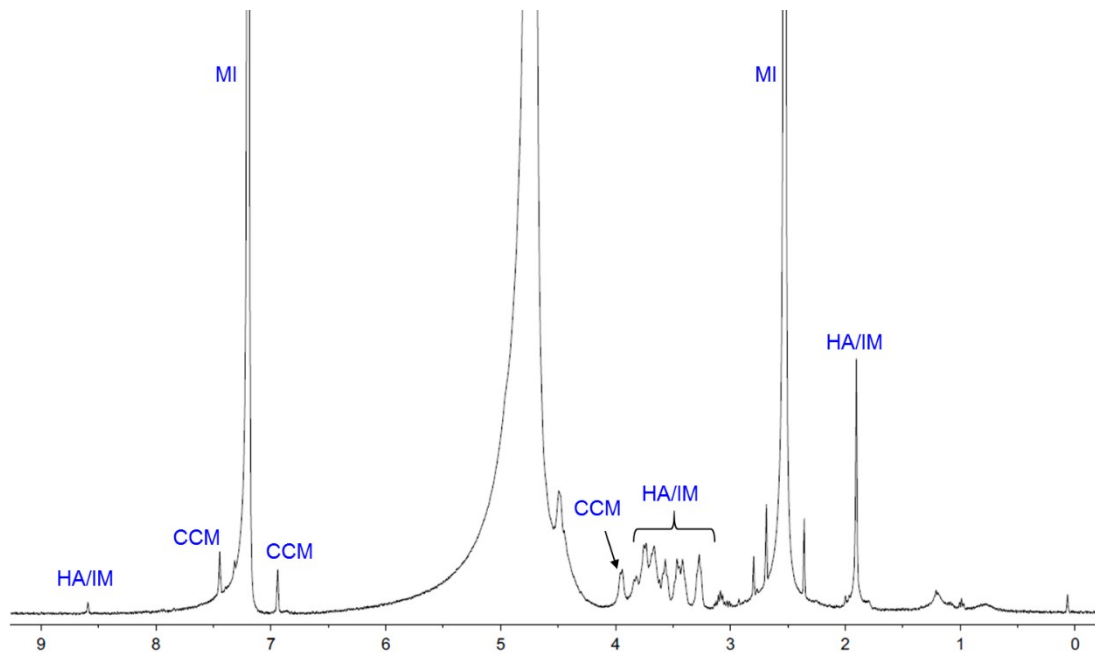

**Fig. S7**  $^1\text{H}$ -NMR spectrum of CCM@ZIF-8/HA digested in  $\text{D}_2\text{O}$  with small amount of HCl.
